# Supplementary material for: Comparison of Three Lateral Flow Immunoassay Formats for the Detection of Antibodies against the SARS-CoV-2 Antigen
Source: MDPI journal article supplement (doi:10.3390/bios13070750), 2023-07-20
Supplement: s1 [file s1]

## *Supplementary information*

### **Comparison of three lateral flow immunoassay formats for the detection of antibodies against the SARS-CoV-2 antigen**

**Dmitriy V. Sotnikov<sup>1\*</sup>, Nadezhda A. Byzova<sup>1</sup>, Anatoly V. Zherdev<sup>1</sup>, Youchun Xu<sup>2</sup>, Boris B. Dzantiev<sup>1</sup>**

<sup>1</sup> A.N. Bach Institute of Biochemistry, Research Center of Biotechnology of the Russian Academy of Sciences, Leninsky prospect 33, Moscow 119071, Russia; sotnikov-d-i@mail.ru; nbyzova@inbi.ras.ru; zherdev@inbi.ras.ru; dzantiev@inbi.ras.ru

<sup>2</sup> State Key Laboratory of Membrane Biology, Department of Biomedical Engineering, School of Medicine, Tsinghua University, Beijing 100084, China; xyc2012@mail.tsinghua.edu.cn

**Table S1.** ELISA testing of sera diluted 300 time (each sample measured in duplicate)

| Serum number      | <b>1</b>                       | <b>2</b>                       | <b>3</b>                       | <b>4</b>                       | <b>5</b>                       | <b>6</b>                       | <b>7</b>                       | <b>8</b>                       |
|-------------------|--------------------------------|--------------------------------|--------------------------------|--------------------------------|--------------------------------|--------------------------------|--------------------------------|--------------------------------|
| OD <sub>450</sub> | <b>0.96</b><br><b>± 0.035</b>  | <b>0.915</b><br><b>± 0.025</b> | <b>0.81</b><br><b>± 0.012</b>  | <b>0.858</b><br><b>± 0.029</b> | <b>0.223</b><br><b>± 0.035</b> | <b>0.438</b><br><b>± 0.027</b> | <b>0.115</b><br><b>± 0.011</b> | <b>0.338</b><br><b>± 0.018</b> |
| Serum number      | <b>9</b>                       | <b>10</b>                      | <b>11</b>                      | <b>12</b>                      | <b>13</b>                      | <b>14</b>                      |                                |                                |
| OD <sub>450</sub> | <b>0.244</b><br><b>± 0.065</b> | <b>0.305</b><br><b>± 0.021</b> | <b>0.182</b><br><b>± 0.012</b> | <b>0.378</b><br><b>± 0.009</b> | <b>0.351</b><br><b>± 0.01</b>  | <b>0.287</b><br><b>± 0.008</b> |                                |                                |
| Serum number      | 15                             | 16                             | 17                             | 18                             | 19                             | 20                             | 21                             | 22                             |
| OD <sub>450</sub> | 0.107<br>± 0.002               | 0.098<br>± 0.001               | 0.104<br>± 0.001               | 0.184<br>± 0.003               | 0.075<br>± 0.002               | 0.068<br>± 0.001               | 0.082<br>± 0.002               | 0.102<br>± 0.002               |

**Table S2.** LFIA testing of sera diluted 10, 30 and 100 times with test strips by schemes A, B, and C (each sample was tested with two test strips)

| Serum number | Scheme A                                                                            |                                                                                     |                                                                                     | Scheme B                                                                            |                                                                                     |                                                                                      | Scheme C                                                                              |                                                                                       |                                                                                       |
|--------------|-------------------------------------------------------------------------------------|-------------------------------------------------------------------------------------|-------------------------------------------------------------------------------------|-------------------------------------------------------------------------------------|-------------------------------------------------------------------------------------|--------------------------------------------------------------------------------------|---------------------------------------------------------------------------------------|---------------------------------------------------------------------------------------|---------------------------------------------------------------------------------------|
|              | dilution                                                                            |                                                                                     |                                                                                     | dilution                                                                            |                                                                                     |                                                                                      | dilution                                                                              |                                                                                       |                                                                                       |
|              | 1:10                                                                                | 1:30                                                                                | 1:100                                                                               | 1:10                                                                                | 1:30                                                                                | 1:100                                                                                | 1:10                                                                                  | 1:30                                                                                  | 1:100                                                                                 |
| 1            |    |    |    |    |    |    |    |    |    |
| I (a.u.)     | 3.2<br>± 0.7                                                                        | 4.5<br>± 0.75                                                                       | 4.4<br>± 0.15                                                                       | 23.0<br>± 0.55                                                                      | 10.3<br>± 1.1                                                                       | 2.25<br>± 0.15                                                                       | 28.5<br>± 1.4                                                                         | 27.4<br>± 0.65                                                                        | 25.8<br>± 0.95                                                                        |
| 2            |    |    |    |    |    |    |    |    |    |
| I (a.u.)     | 2.9<br>± 0                                                                          | 2.0<br>± 0.3                                                                        | 1.78<br>± 0.35                                                                      | 10.1<br>± 0.6                                                                       | 3.5<br>± 0.35                                                                       | 0                                                                                    | 29.2<br>± 0.65                                                                        | 26.9<br>± 0.6                                                                         | 25.4<br>± 0.1                                                                         |
| 3            |    |    |    |    |    |    |    |    |    |
| I (a.u.)     | 4.8<br>± 0.08                                                                       | 2.1<br>± 0.15                                                                       | 0                                                                                   | 3.6<br>± 0.28                                                                       | 2.5<br>± 0.03                                                                       | 0                                                                                    | 21.5<br>± 0.45                                                                        | 17.6<br>± 0.1                                                                         | 14.9<br>± 0.33                                                                        |
| 4            |   |   |   |   |   |   |   |   |   |
| I (a.u.)     | 5.9<br>± 0.35                                                                       | 2.9<br>± 0.03                                                                       | 0                                                                                   | 17.5<br>± 0.4                                                                       | 4.6<br>± 1.15                                                                       | 0                                                                                    | 34.6<br>± 0.25                                                                        | 33.9<br>± 1.15                                                                        | 28.1<br>± 0.8                                                                         |
| 5            |  |  |  |  |  |  |  |  |  |
| I (a.u.)     | 2.9<br>± 0.5                                                                        | 0                                                                                   | 0                                                                                   | 0                                                                                   | 0                                                                                   | 0                                                                                    | 11.6<br>± 0.95                                                                        | 9.7<br>± 0.56                                                                         | 5.1<br>± 0.2                                                                          |
| 6            |  |  |  |  |  |  |  |  |  |
| I (a.u.)     | 0                                                                                   | 0                                                                                   | 0                                                                                   | 0                                                                                   | 0                                                                                   | 0                                                                                    | 11.0<br>± 0.3                                                                         | 7.5<br>± 0.25                                                                         | 5.9<br>± 0.85                                                                         |
| 7            |  |  |  |  |  |  |  |  |  |
| I (a.u.)     | 2.2<br>± 0.25                                                                       | 0                                                                                   | 0                                                                                   | 0                                                                                   | 0                                                                                   | 0                                                                                    | 5.8<br>± 0.5                                                                          | 5.1<br>± 0.38                                                                         | 3.0<br>± 0.03                                                                         |

|          |                                                                                     |                                                                                     |                                                                                     |                                                                                     |                                                                                     |                                                                                      |                                                                                       |                                                                                       |                                                                                       |
|----------|-------------------------------------------------------------------------------------|-------------------------------------------------------------------------------------|-------------------------------------------------------------------------------------|-------------------------------------------------------------------------------------|-------------------------------------------------------------------------------------|--------------------------------------------------------------------------------------|---------------------------------------------------------------------------------------|---------------------------------------------------------------------------------------|---------------------------------------------------------------------------------------|
| 8        |    |    |    |    |    |    |    |    |    |
| I (a.u.) | 1.4<br>$\pm 0.15$                                                                   | 0                                                                                   | 0                                                                                   | 0                                                                                   | 0                                                                                   | 0                                                                                    | 10.3<br>$\pm 1.17$                                                                    | 8.8<br>$\pm 1.38$                                                                     | 6.6<br>$\pm 0.45$                                                                     |
| 9        |    |    |    |    |    |    |    |    |    |
| I (a.u.) | 3.3<br>$\pm 0.6$                                                                    | 2.0<br>$\pm 0.58$                                                                   | 0                                                                                   | 0                                                                                   | 0                                                                                   | 0                                                                                    | 8.5<br>$\pm 0.5$                                                                      | 8.8<br>$\pm 0.2$                                                                      | 4.9<br>$\pm 0.35$                                                                     |
| 10       |    |    |    |    |    |    |    |    |    |
| I (a.u.) | 2.2<br>$\pm 0.43$                                                                   | 0                                                                                   | 0                                                                                   | 0                                                                                   | 0                                                                                   | 0                                                                                    | 8.7<br>$\pm 0.25$                                                                     | 7.4<br>$\pm 0.25$                                                                     | 4.2<br>$\pm 0.5$                                                                      |
| 11       |    |    |    |    |    |    |    |    |    |
| I (a.u.) | 2.2<br>$\pm 0.2$                                                                    | 0                                                                                   | 0                                                                                   | 0                                                                                   | 0                                                                                   | 0                                                                                    | 10.4<br>$\pm 0.9$                                                                     | 8.3<br>$\pm 0.28$                                                                     | 6.4<br>$\pm 0.25$                                                                     |
| 12       |   |   |   |   |   |   |   |   |   |
| I (a.u.) | 1.6<br>$\pm 0.14$                                                                   | 0                                                                                   | 0                                                                                   | 0                                                                                   | 0                                                                                   | 0                                                                                    | 9.6<br>$\pm 1.4$                                                                      | 11.6<br>$\pm 0.4$                                                                     | 8.7<br>$\pm 1.13$                                                                     |
| 13       |  |  |  |  |  |  |  |  |  |
| I (a.u.) | 2.7<br>$\pm 0.4$                                                                    | 2.0<br>$\pm 0.5$                                                                    | 0                                                                                   | 1.6<br>$\pm 0.1$                                                                    | 0                                                                                   | 0                                                                                    | 5.6<br>$\pm 0.05$                                                                     | 4.1<br>$\pm 0.55$                                                                     | 3.0<br>$\pm 0.3$                                                                      |
| 14       |  |  |  |  |  |  |  |  |  |
| I (a.u.) | 0                                                                                   | 0                                                                                   | 0                                                                                   | 0                                                                                   | 0                                                                                   | 0                                                                                    | 5.4<br>$\pm 0.1$                                                                      | 6.4<br>$\pm 0.2$                                                                      | 5.6<br>$\pm 0.4$                                                                      |
| 15       |  |  |  |  |  |  |  |  |  |
| I (a.u.) | 0                                                                                   | 0                                                                                   | 0                                                                                   | 0                                                                                   | 0                                                                                   | 0                                                                                    | 1.6<br>$\pm 0.29$                                                                     | 0                                                                                     | 0                                                                                     |

[illegible]
